# Supplementary material for: Biocontrol of Penicillium digitatum on Postharvest Citrus Fruits by Pseudomonas fluorescens
Source: Hindawi journal article supplement (doi:10.1155/2018/2910481), 2018-11-14

## Supplementary

The presence of genes for the biosynthesis of 2,4-diacetylphloroglucinol (DAPG), phenazine-1-carboxylic acid (PCA), pyrrolnitrin (Prn), pyoluteorin (Plt) and hydrogen cyanide (HCN) was determined by polymerase chain reaction (PCR) using the primer sets described in Table 1. The PCR reactions were performed according to [1]. Our *P. fluorescens* strain was negative for the genes encoding the production of DAPG, PCA, Prn, Plt and HCN (Fig. 1).

Table 1

Target antibiotic genes and primers used in PCR analysis

| Target gene | Sequence-F               | Sequence-R              | Length/bp | Reference |
|-------------|--------------------------|-------------------------|-----------|-----------|
| PCA         | TTGCCAAGCCTCGCTCCAAC     | CCGCGTTGTTCTCGTTCAT     | 1150      | [2]       |
| DAPG        | GAGGACGTCGAAGACCACCA     | ACCGCAGCATCGTGTATGAG    | 745       | [2]       |
| Plt         | AACAGATCGCCCCGGTACAGAACG | AGGCCCGGACACTCAAGAACTCG | 438       | [3]       |
| Prn         | GGGGCGGGCCGTGGTGATGGA    | YCCCGCSGCCTGYCTGGTCTG   | 786       | [3]       |
| HCN         | ACTGCCAGGGGCGGATGTGC     | ACGATGTGCTCGGCGTAC      | 587       | [4]       |

Marker PCA DAPG Plt Prn HCN

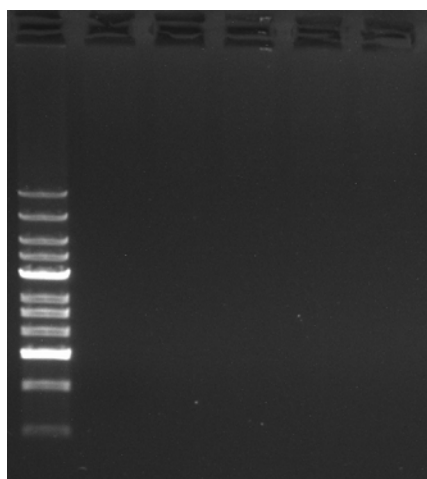

**Fig. 1** Agarose gel showing the PCR amplification

## References

- [1] WALLACE, R.L., HIRKALA, D.L. and NELSON, L.M. 2017. Postharvest biological control of blue mold of apple by *Pseudomonas fluorescens* during commercial storage and potential modes of action. *Postharvest Biology and Technology* **133**, 1-11.
- [2] RAAIJMAKERS, J.M., BONSALE, R.F. and WELLER, D.M. 1999. Effect of population density of *Pseudomonas fluorescens* on production of 2,4-diacetylphloroglucinol in the rhizosphere of wheat. *Phytopathology* **89**, 470-475.
- [3] SOUZA, J.T. and RAAIJMAKERS, J.M. 2003. Polymorphisms within the *prnD* and *pltC* genes from pyrrolnitrin and pyoluteorin-producing *Pseudomonas* and *Burkholderia* spp. *Fems Microbiology Ecology* **43**, 21-34.
- [4] RAMETTE, A., FRAPOLLI, M., DEFAGO, G., et al. 2003. Phylogeny of HCN synthase-encoding *hcnBC* genes in biocontrol fluorescent pseudomonads and its relationship with host plant species and HCN synthesis ability. *Mol Plant Microbe Interact*, **16**, 525-535.

Graphical Abstract

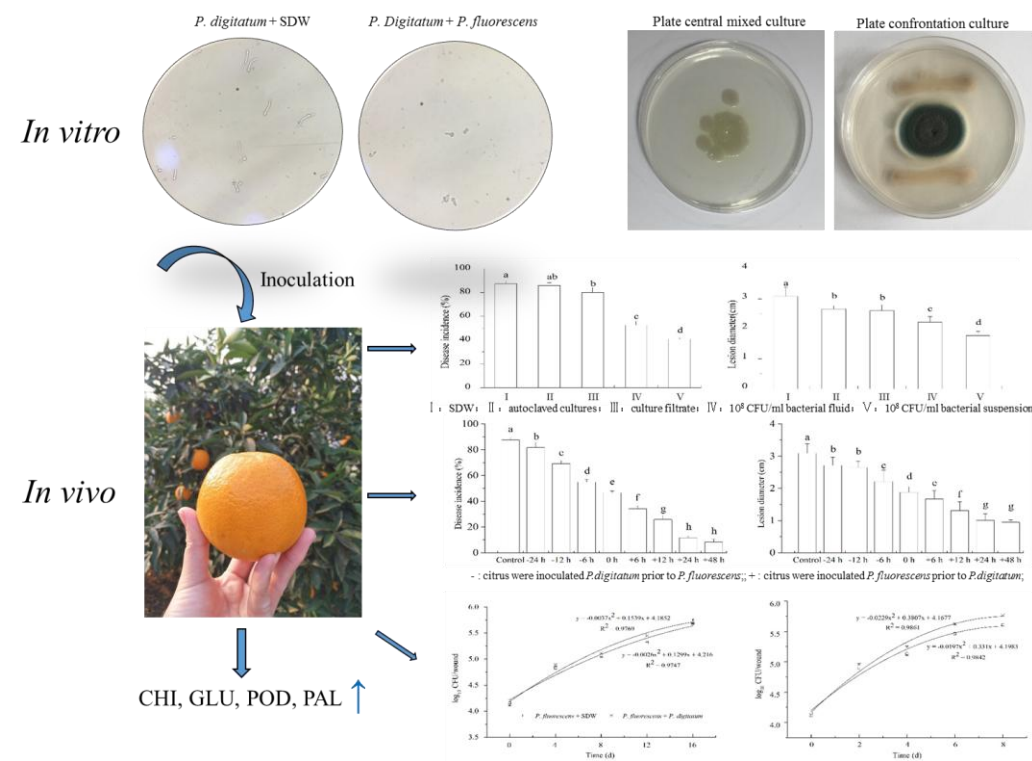

Supplement: f1 [file 2910481.f1.pdf]
